# Supplementary material
Source: publisher figshare collection journal article supplement (https://acs.figshare.com/ndownloader/files/3756178)
Supplement: Supplementary file 1 [file 3756178]

## Supporting information

### ‘Black’ TiO<sub>2</sub> nanotubes formed by high energy proton implantation show noble-metal-co-catalyst free photocatalytic H<sub>2</sub>-evolution

*Ning Liu<sup>1</sup>, Volker Häublein<sup>2</sup>, Xuemei Zhou<sup>1</sup>, Umamaheswari Venkatesan<sup>3</sup>, Martin Hartmann<sup>3</sup>, Mirza Mačković<sup>4</sup>, Tomohiko Nakajima<sup>5</sup>, Erdmann Spiecker<sup>4</sup>, Andres Osvel<sup>6</sup>, Lothar Frey<sup>2</sup>, Patrik Schmuki<sup>1\*</sup>*

<sup>1</sup>Department of Materials Science WW-4, LKO, University of Erlangen-Nuremberg, Martensstrasse 7, 91058 Erlangen, Germany;

<sup>2</sup>Fraunhofer Institute for Integrated Systems and Device Technology IISB, Schttkystrasse 10, 91058 Erlangen, Germany;

<sup>3</sup>ECRC - Erlangen Catalysis Resource Center, University of Erlangen-Nuremberg, Egerlandstrasse 3, 91058 Erlangen, Germany;

<sup>4</sup>Institute of Micro- and Nanostructure Research (WW9) & Center for Nanoanalysis and Electron Microscopy (CENEM), University of Erlangen-Nuremberg, Cauerstrasse 6, 91058 Erlangen, Germany;

<sup>5</sup>National Institute of Advanced Industrial Science and Technology, Tsukuba Central 5, 1-1-1 Higashi, Tsukuba, Ibaraki 305-8565, Japan;

<sup>6</sup>Department of Materials Sciences 6, iMEET, University of Erlangen-Nuremberg, , Martensstrasse 7, 91058 Erlangen, Germany;

\*Corresponding author. Tel.: +49 91318517575, fax: +49 9131 852 7582

Email: [schmuki@ww.uni-erlangen.de](mailto:schmuki@ww.uni-erlangen.de)

## Experimental:

As substrates for TiO<sub>2</sub> nanotube growth we used titanium foils (99.6% purity, Goodfellow) with a thickness of 0.1 mm. Prior to tube formation the foils were cleaned by sonication in acetone and ethanol followed by rinsing with deionized (DI) water and drying in a nitrogen stream. To perform electrochemical TiO<sub>2</sub> nanotube formation, the foils were anodized using a power supply (Votcraft VLP 2403 pro) in a two electrode configuration with a counter electrode made from platinum gauze. The typical electrolyte for TiO<sub>2</sub> nanotubes was prepared from ethylene glycol (EG, Sigma–Aldrich, containing less than 0.2 wt% H<sub>2</sub>O), with addition of 1 M DI H<sub>2</sub>O and 0.1 M NH<sub>4</sub>F (Sigma–Aldrich, 98%). The anodization was carried out at 60V for 2, 5, 15 and 30 min, and TiO<sub>2</sub> nanotube layers of a thickness of about 1, 2, 7 and 12 μm were obtained.

Thermal treatments of the nanotube layers were carried out in air using a Rapid Thermal Annealer (Jipelec JetFirst 100) at 500 °C with heating/cooling rates of 1 °C/s. The samples were annealed at 450 °C for 1 h.

The single crystal anatase wafers were obtained from natural anatase to an epi-polished (001) surface (SurfaceNet GmbH, Germany).

Proton implantation was carried out at an energy of 30 keV and a nominal dose of 10<sup>16</sup> ions/cm<sup>2</sup> using a Varian 350 D ion implanter.

A Hitachi FE-SEM S4800 was used for morphological characterization of the samples. The length of the nanotubes was directly obtained from SEM cross-sections. XRD patterns were collected using an X'pert Philips PMD diffractometer with a Panalytical X'celerator detector, using graphite-monochromatized CuKα radiation ( $\lambda = 1.54056\text{\AA}$ ). The chemical composition of the layer was characterized with X-ray photoelectron spectroscopy (XPS, PHI 5600 XPS spectrometer, US).

Transmission electron microscopy (TEM) was performed with a Titan<sup>3</sup> Themis 300, a Phillips CM300 UltraTWIN and a Philips CM30 TWIN/STEM (FEI Company, Netherlands). The Titan<sup>3</sup> Themis 300 is equipped with a high-brightness field-emission gun (X-FEG), a monochromator system (energy resolution 0.2 eV), two C<sub>s</sub>-correctors (probe and image side) from CEOS (Corrected Electron Optical Systems GmbH), a Super-X detector (for energy dispersive X-ray spectroscopy), a Gatan Imaging Filter, a high-angle annular dark-field (HAADF) detector and a 4k CMOS camera. This microscope was operated at 200 kV acceleration voltage. The Philips CM300 UltraTWIN and the CM30 TWIN/STEM microscopes are equipped with LaB<sub>6</sub> filaments, 2k and 1k charged coupled device cameras from TVIPS (Germany), respectively, and were operated at 300 kV acceleration voltage. For TEM analysis the TiO<sub>2</sub> nanotubes are prepared on commonly used copper TEM grids coated with a holey carbon film. During TEM analysis no noticeable electron-beam-induced damage was observed. The free available software ImageJ (version 1.48r) and the commercially available software

DigitalMicrograph<sup>TM</sup> were used for image analysis. The evaluation of the electron diffraction patterns was performed by using the software JEMS<sup>1</sup> (version version 3.7624U2012) and the inorganic crystal structure database (ICSD).

The room temperature CW EPR spectra were recorded on an X-band ( $\nu_{mw} = 9.84$  GHz) EMXmicro BRUKER spectrometer and at 70 K using an Oxford flow cryostat with liquid nitrogen flow. The  $B_0$  modulation amplitude used was 0.4 mT, and the modulation frequency was adjusted to  $\nu_{mod} = 100$  kHz. The microwave power used was low enough to prevent the saturation of the spin systems.

The photoluminescence (PL) of the powder samples was excited with a 375 nm diode laser and the spectra were recorded at room temperature with an iHR320 monochromator and Synergy Si CCD camera (both Horiba Jobin-Yvon). The spectra are corrected for the spectral sensitivity of the setup, determined with the help of a calibrated halogen lamp.

Measurements of Raman spectra were performed on a Spex 1403 Raman Spectrometer. A line (632 nm) of a HeNe laser was taken as the excitation source.

Photocatalytic hydrogen generation was measured under open circuit conditions from an aqueous methanol solution (50 vol%) under AM 1.5 ( $100 \text{ mW/cm}^2$ ) solar simulator illumination. The amount of  $\text{H}_2$  produced was measured using a Varian gas chromatograph with a TCD detector. For rate determination, data were taken approximately every 24 h during solar simulator irradiation. To prepare suspensions for  $\text{H}_2$  measurements, 2 mg  $\text{TiO}_2$  powders were dispersed in 10 mL of DI water/methanol (50/50 v%) with ultrasonication for 30 min. During illumination, the suspensions were continuously stirred.

Monte-Carlo simulations of the implant and damage depth-distributions were carried out using TRIM 2008 and 2013 [2]. (We consider the small peaks appearing in the profiles at energies  $\sim 180$  nm (tube) and 50 nm (single crystal) as artifacts of the TRIM code).

[1] P. A. Stadelmann, Jems Electron Microscopy Software, (1999–2012), java version 3.7624U2012, CIME-EPFL, Switzerland.

[2] Ziegler, J. F.; Biersack, J. P.; Littmark, U. The Stopping and Range of Ions in Solids; Pergamon Press: New York, 1985.

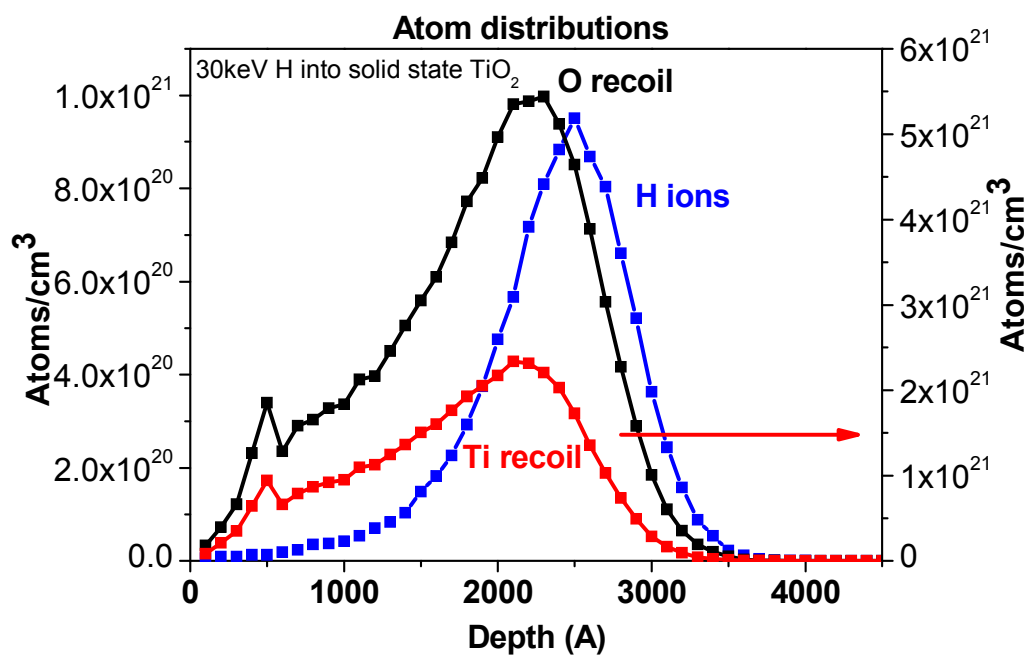

**Fig. S1** Calculation depth distribution of implanted protons (H ions) and crystal damage (titanium and oxygen recoil) in pure  $\text{TiO}_2$  anatase substrate.

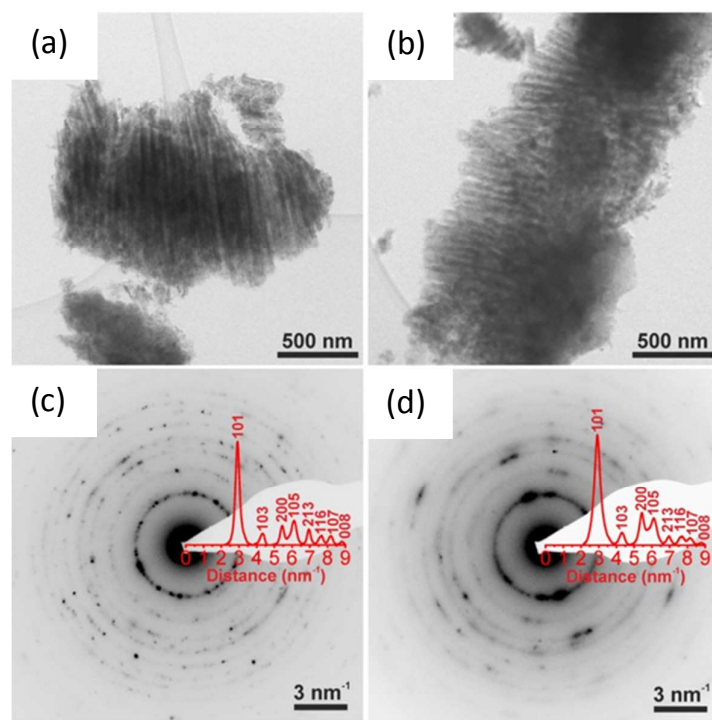

**Fig. S2** Representative bright-field (BF) TEM images in Figure 1a) and b) show bundles of TiO<sub>2</sub> nanotubes after conventional annealing in air (to anatase) and after H implantation, respectively and corresponding electron diffraction patterns (see Fig. 2c and d).

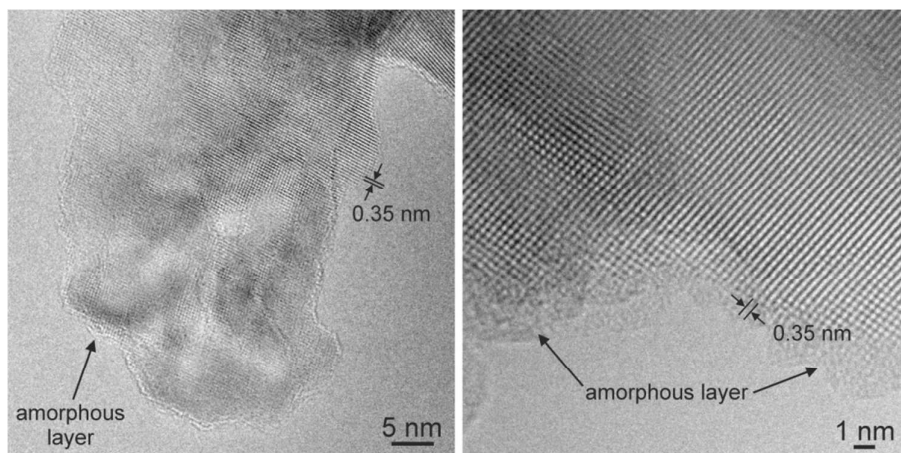

**Figure S3.** HRTEM images of reference TiO<sub>2</sub> nanotubes.

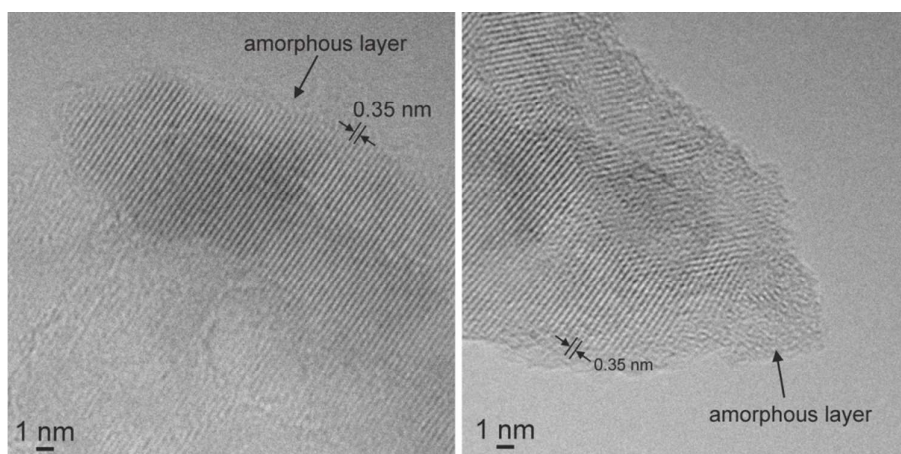

**Figure S4.** HRTEM images of TiO<sub>2</sub> nanotubes after H-implantation.

**Fig. S3 and Fig. S4** Additional HRTEM images of samples are provided, which support statements given in the manuscript. A careful analyses under HRTEM conditions also revealed that electron beam irradiation does not introduce effects, such as re-crystallization, amorphization and/or pore formation in the nanotubes. These images indicate that amorphous layers are present in as annealed and implanted tubes.

## Raman Spectra:

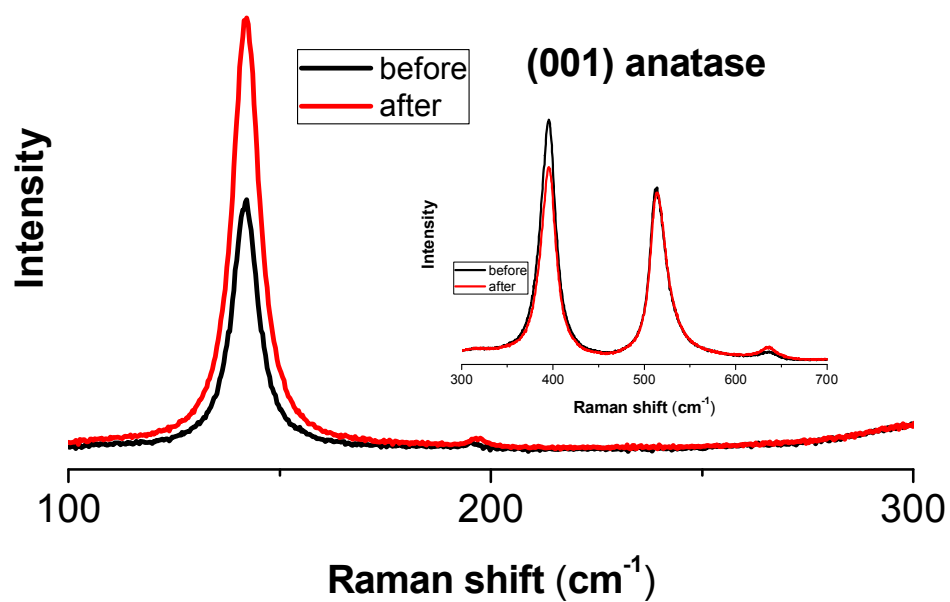

Fig. S5 Raman spectra of (001) anatase single crystal before and after H-implantation.

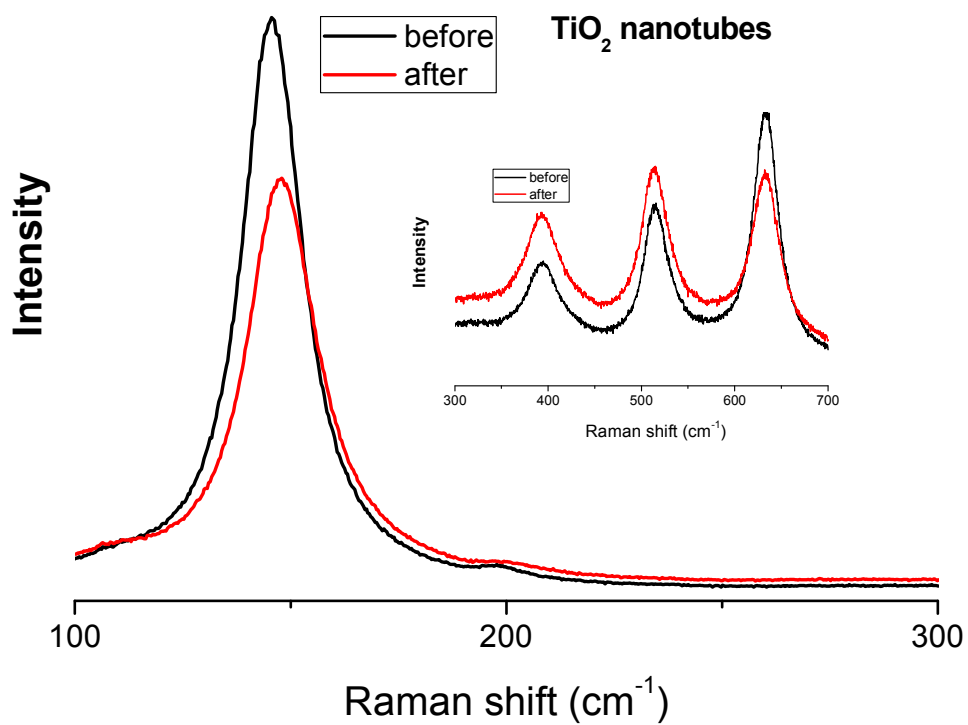

Fig. S6 Raman spectra for  $\text{TiO}_2$  nanotubes before and after H-implantation.

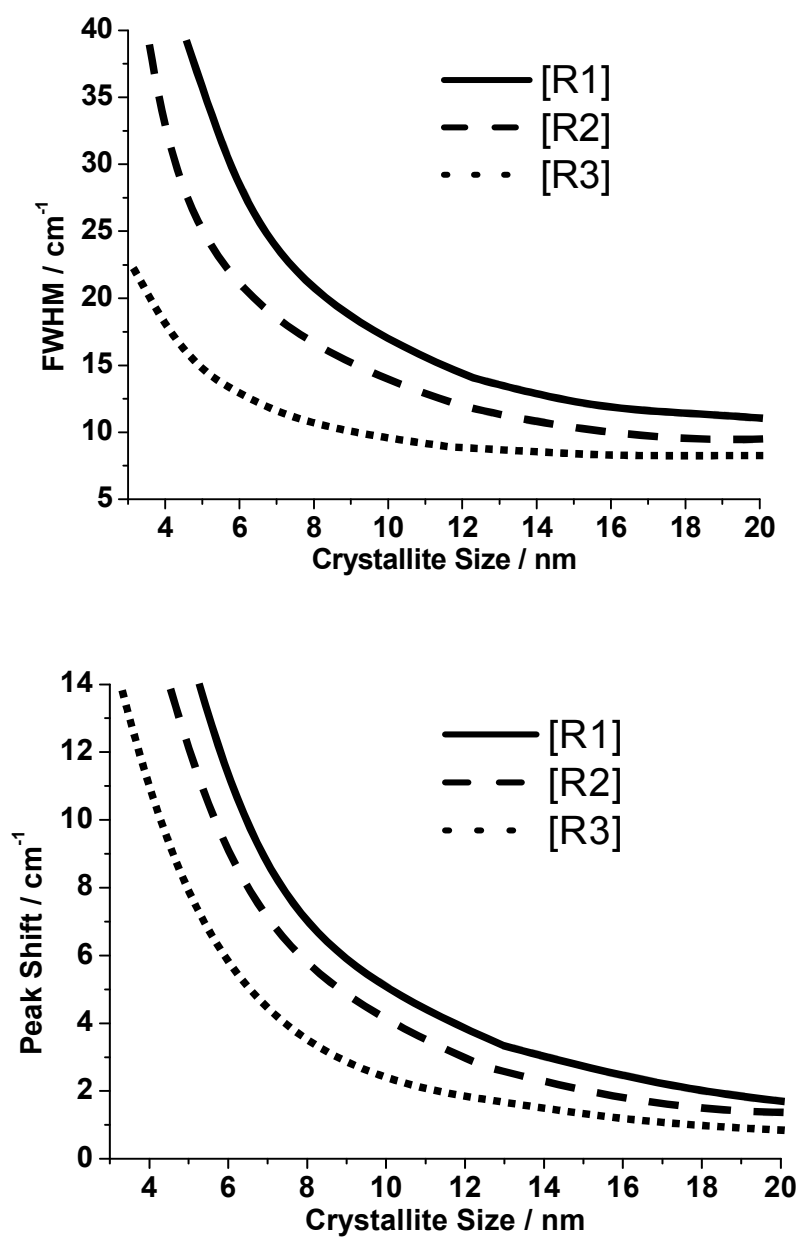

**Fig. S7** Various calculated models predicting the relationship of FWHM and peak shift of main Eg Raman line as a function of TiO<sub>2</sub> feature size.

[R1]: M. Ivanda , S. Music , M. Gotic , A. Turkovic , A. M. Tonejc , O. Gamulin , J. Mol. Struct. 1999 , 480 , 641.

[R2]: S. Balaji ,Y. Djaoued , J. Robichaud , J. Raman Spectrosc. 2006 , 37 , 1416 .

[R3]: D. Bersani , P. P. Lottici , X-Z. Ding , Appl. Phys. Lett. 1998 , 72 , 73.



**Rietveld analysis** of XRD spectra was carried out using the RIETAN-FP program [1] and Toroya's split pseudo-Voigt profile function for the calculations of structural parameters and integrated intensity. The diffraction patterns of the reference and H-implanted TiO<sub>2</sub> nanotubes were fitted by using a TiO<sub>2</sub> anatase model.

## TiO<sub>2</sub>

Structural model: Anatase TiO<sub>2</sub>

Space group:  $I 4_1/a m d$  (VOL. A, 141)

$R_{WP} = 7.623\%$ ,  $R_e = 4.164\%$

$a = 3.7877(2) \text{ \AA}$ ,  $c = 9.5090(4) \text{ \AA}$ ,  $V = 136.42(1) \text{ \AA}^3$

| Atom | $x$ | $y$ | $z$       | $B$     |
|------|-----|-----|-----------|---------|
| Ti   | 0   | 0   | 0         | 1.07(8) |
| O    | 0   | 0   | 0.2085(3) | 0.5(1)  |

## H:TiO<sub>2</sub>

Structural model: Anatase TiO<sub>2</sub>

Space group:  $I 4_1/a m d$  (VOL. A, 141)

$R_{WP} = 9.627\%$ ,  $R_e = 6.057\%$

$a = 3.7904(6) \text{ \AA}$ ,  $c = 9.530(2) \text{ \AA}$ ,  $V = 136.93(4) \text{ \AA}^3$

| Atom | $x$ | $y$ | $z$      | $B$    |
|------|-----|-----|----------|--------|
| Ti   | 0   | 0   | 0        | 1.2(3) |
| O    | 0   | 0   | 0.204(2) | 0.8(5) |

Calculated intensity of reference and H-implanted nanotubes

| Index | $2\theta / ^\circ$ | $d / \text{\AA}$ | Integrated intensity |           |             |
|-------|--------------------|------------------|----------------------|-----------|-------------|
|       |                    |                  | Theoretical          | Reference | H-implanted |
| 101   | 25.308             | 3.51629          | 100000               | 31223     | 27111       |
| 103   | 36.951             | 2.43073          | 6700                 | 4294      | 1723        |
| 004   | 37.79              | 2.37865          | 20586                | 100000    | 7955        |
| 112   | 38.572             | 2.33222          | 7844                 | 2466      | 2076        |
| 200   | 48.047             | 1.8921           | 29051                | 7032      | 6707        |
| 202   | 51.969             | 1.75815          | 0                    | 0         | 0           |
| 105   | 53.885             | 1.70007          | 18812                | 21987     | 15665       |
| 211   | 55.072             | 1.66619          | 18637                | 4663      | 4124        |
| 213   | 62.117             | 1.49308          | 3353                 | 924       | 621         |
| 204   | 62.692             | 1.48076          | 14761                | 6168      | 3432        |
| 116   | 68.756             | 1.3642           | 6674                 | 5664      | 2370        |
| 220   | 70.303             | 1.33792          | 7278                 | 1760      | 1507        |

The (001)-orientation degree was evaluated in terms of the Lotgering factor  $F(001)$ , which is

calculated from the following equation,<sup>\*2</sup>  $F = (P - P_0) / (1 - P_0)$  where  $P_0 = \Sigma I_0(hkl) / \Sigma I_0(HKL)$  and  $P = \Sigma I(hkl) / \Sigma I(HKL)$ .  $I_0$  and  $I$  are the integrated intensities of each of the diffraction peaks in X-ray diffraction patterns as presented in ICSD database and in experimental data, respectively.  $F(001)$  values of the reference and H-implanted nanotubes were calculated to be 49.2% and 2.2%, respectively.

[\*1] F. Izumi and K. Momma, *Solid State Phenom.*, 2007, **130**, 15.

[\*2] F. K. Lotgering, *J. Inorg. Nucl. Chem.*, 1959, **9**, 113.
